# Supplementary material for: The Efficacy of a Human-Ready miniMECP2 Gene Therapy in a Pre-Clinical Model of Rett Syndrome
Source: Genes (Basel). 2023 Dec 24;15(1):31. doi: 10.3390/genes15010031 (PMC10815157; doi:10.3390/genes15010031)
Supplement: Supplementary file 1 [file genes-15-00031-s001.zip › Supplementary File 2.xlsx]

## Sheet: Sheet1
Individual miniMeCP2 mRNA Data (ss copies per µg of total RNA)
	Mouse ID # for Female WT Mice						Mouse ID# for Male KO Mice			Mouse ID# for TSHA-102-treated Female WT Mice						Mouse ID# for TSHA-102-treated Male WT Mice					Mouse ID # for TSHA-102-treated Male KO Mice
	1585	1586	1587	1593	1621	1625	1476	1509	1521	1599	1600	1606	1607	1615	1616	1596	1598	1608	1610	1613	1526	1536	1551	1603	1609	1628	1629	1631	1636	1637
Brain	BLOD	BLOD	BLOD	BLOD	BLOD	BLOD	BLOD	BLOD	BLOD	BLOQ	1686.66	1572.58	BLOQ	3214.6	1380.08	BLOQ	1492.42	1119.28	1108.18	BLOQ	BLOQ	5981.6	31940	BLOQ	BLOQ	5194.06	1226.82	BLOQ	BLOQ	1341.38
Spinal Cord - Cervical	BLOD	BLOD	BLOD	BLOD	BLOQ	BLOD	BLOD	BLOD	BLOD	BLOQ	6385.38	2188.14	116339	2513.72	9604.42	1843.02	4158.78	82594.3	2712.74	2127.9	1.23328e+06	358826	3.6038e+06	3809.3	3073.05	3.34328e+06	2549.42	BLOQ	9635.51	3916.84
Spinal Cord - Thoracic	BLOD	BLOD	BLOD	BLOD	BLOD	BLOD	BLOD	BLOD	BLOD	4642.04	47719.4	5079.02	205363	4568.92	5677.52	3273.54	17333.4	79948.6	5788.2	4350.32	1.13055e+06	607524	563812	14672.5	22600.9	98696.6	41571.5	BLOQ	2549.7	1302.8
Spinal Cord - Lumbar	BLOD	BLOD	BLOD	BLOD	BLOD	BLOD	BLOD	BLOD	BLOD	29026.9	BLOQ	25769.4	1.60512e+06	147743	909531	138440	1.41997e+06	31542.3	12947.4	11647.8	328172	272564	2.19393e+06	16646.5	529067	2.23151e+06	703608	27654.4	125143	141221
Liver	BLOD	BLOD	BLOD	BLOD	BLOD	BLOD	BLOD	BLOD	BLOD	336987	260992	51085.3	25397.9	285967	215483	215829	161287	28258.1	28250.2	93690.8	44025.9	166467	364307	48122	58439	80600.6	88514.6	36227.1	109029	38012.3
Sciatic Nerve	BLOD	BLOD	BLOD	BLOD	BLOD	BLOD	BLOD	BLOD	BLOD	17464.5	BLOQ	BLOQ	BLOQ	BLOQ	BLOQ	BLOQ	BLOQ	BLOQ	BLOQ	BLOQ	BLOQ	BLOQ	BLOQ	BLOQ	BLOQ	BLOQ	BLOQ	3996.73	BLOQ	BLOQ
In Vivo Study Site: UTSWMC
BLOD = Below the Limit of Detection
BLOQ = Below the Limit of Quantification
TSHA-102 Dose = 8.8 x 1011 vg/mouse
Results showing < 10 copies of single-stranded vector-derived mRNA per 100 ng of total RNA were reported as BLOD; ≥ 10 and < 100 copies were reported as BLOQ.
